## Exploring the short-term role of particulate matter in the COVID-19 outbreak in USA cities

Leonardo Yoshiaki Kamigauti<sup>1</sup>, Gabriel Martins Palma Perez<sup>2</sup>, Carlos Eduardo Souto-Oliveira<sup>1</sup>, Elizabeth Cowdery<sup>3</sup>, Paulo Hilário Nascimento Saldiva<sup>4</sup>, Maria de Fatima Andrade<sup>1</sup>

---

### Abstract

The role of particulate matter (PM) in the COVID-19 pandemic is currently being discussed by the scientific community. Long-term (years) exposure to PM is known to affect human health by increasing susceptibility to viral infections as well as to the development of respiratory and cardiovascular symptoms. In the short-term (days to months), PM has been suggested to assist airborne viral transmission. However, confounding factors such as urban mobility prevent causal conclusions. In this study, we explore short-term relationships between PM concentrations and the evolution of COVID-19 cases in a number of cities in the United States of America. We focus on the role of PM in facilitating viral transmission in early stages of the pandemic. We analyzed PM concentrations in two particle size ranges,  $< 2.5 \mu m$ , and between 10 and  $2.5 \mu m$  (PM<sub>2.5</sub> and PM<sub>10</sub> respectively) as well as carbon monoxide (CO) and nitrogen dioxide (NO<sub>2</sub>). Granger causality analysis was employed to identify instantaneous and lagged effects of pollution in peaks of COVID-19 new daily cases in each location. The effect of pollution in shaping the disease spread was evaluated by correlating the logistic growth rate of accumulated cases with pollutants concentrations for a range of time lags and accumulation windows. PM<sub>2.5</sub> shows

---

\*Corresponding author

*Email address:* [leonardo.kamigauti@usp.br](mailto:leonardo.kamigauti@usp.br) (Leonardo Yoshiaki Kamigauti)

<sup>1</sup>Department of Atmospheric Sciences, University of São Paulo, São Paulo, Brazil

<sup>2</sup>Department of Meteorology, University of Reading, Earley Gate, United Kingdom

<sup>3</sup>Department of Earth and Environment, University of Boston, Boston, United States of America

<sup>4</sup>Department of Pathology, University of São Paulo, São Paulo, Brazil

*Preprint submitted to Journal of L<sup>A</sup>T<sub>E</sub>X Templates*

*March 9, 2021*

the most significant results in Granger causality tests in comparison with the other pollutants. We found a strong and significant association between  $PM_{2.5}$  concentrations and the growth rate of accumulated cases between the 1<sup>st</sup> and 18<sup>th</sup> days after the report of the infection, peaking at the 8<sup>th</sup> day. By comparing results of  $PM_{2.5}$  with  $PM_{10}$ , CO and  $NO_2$  we rule out confounding effects associated with mobility. We conclude that  $PM_{2.5}$  is not a first order effect in the cities considered; however, it plays a significant role in facilitating the COVID-19 transmission. We estimate that the growth rate of COVID-19 cases would be risen by 12.5% if  $PM_{2.5}$  is increased from 25 to 35  $\mu g m^{-3}$ .

*Keywords:* COVID-19, SARS-CoV-2, airborne transmission, particulate matter, Granger's Causality

---

## 1. Introduction

The current pandemic scenario has encouraged the scientific community to gather resources in the characterization of the evolution of COVID-19 [1, 2]. One of the primary and most pressing concern to worldwide policy makers is the saturation of health systems caused by a high number of infections, as  
5 quantified by the reported number of cases per day (daily cases) [3]. Changes in daily cases are characterized by changes in the transmission rate of SARS-CoV-2, which is associated with a number of societal, environmental, and behavioral factors [4]. In this study, we explore the role of pollutants, namely airborne  
10 particulate matter (PM), carbon monoxide (CO) and nitrogen dioxide ( $NO_2$ ), on the evolution of the COVID-19 pandemics across the United States of America (USA).

Statistical links between air quality and COVID-19 daily cases are expected to occur through different mechanisms; in this study, we explore the following  
15 hypotheses: 1) PM has been suggested to facilitate viruses transmission, due to its role in shielding the virus during airborne transport [5, 6, 7, 8, 9]; 2) The long-term exposure, particularly to CO and  $NO_2$ , increases the susceptibility of a population to adverse health conditions [10, 11]; 3) PM levels are associated

with urban mobility [12], thus we expect them to respond to the effectiveness  
20 of local social distancing measures. In the following subsections we discuss in  
detail these mechanisms as well as the statistical techniques employed to explore  
them.

### 1.1. Aerosol-assisted SARS-CoV-2 spread

Short-term interactions between aerosol and airborne viruses can occur through  
25 a spreading assistance mechanism. This mechanism is dependent on the aerosol  
size. Large ( $> 5\mu m$ ) and small droplets ( $< 5\mu m$ ) containing viruses are released  
by infected persons when talking, coughing, sneezing or vomiting. While larger  
droplets travel shorter distances (1 – 2 meters), smaller droplets can travel up to  
tens of meters. In addition, suspended droplets can lose mass by drying and can  
30 also interact with other particles, physically and chemically, further changing  
their travel distances [9].

A growing body of research is investigating virus transport and transmission  
associated with PM. In Spain, deposition rates of billions of viruses per  $m^2$  per  
day were estimated considering long-range transport from air masses coming  
35 from marine and desert sources [13]. In China, influenza-like-illnesses were  
associated with PM with aerodynamic diameter lesser than  $2.5\ \mu m$  ( $PM_{2.5}$ ) in  
lags of 2 days during flu-season [8]. Chen et al. estimated that approximately  
10% of influenza cases result from exposure to ambient  $PM_{2.5}$ , suggesting that  
the reduction of  $PM_{2.5}$  concentrations lowers influenza transmission [7].

40 The preliminary evidence of SARS-CoV-2 interacting with PM was found  
at an industrial site in Bergamo Province, Italy. Samples detected viral RNA  
in PM [5]. Bergamo is characterized by high concentrations of PM and was  
severely affected by COVID-19. In addition, other studies have found viral  
RNA of SARS-CoV-2 in aerosol from hospitals and stores in Wuhan, China [14]  
45 and Nebraska, USA [2]. In the USA, researchers have shown that viruses survive  
in aerosol for at least 3 hours [15]. Tung et al. [16] present a review of studies  
about the virus-PM interaction.

Virus viability in PM is favored by key-compounds which contribute to its

protection. Aerosol particles contain organic matrices of exopolymeric com-  
pounds, which absorb ultraviolet wavelengths and prevent the dehydration of  
50 the virus [17, 18]. In addition, viruses can be stabilized and protected from  
environmental stress and antimicrobial agents by colloidal and solid organic  
matter, such as biofilm [19]. A virus-PM interaction simulation [9] has shown  
enhancement of respiratory syncytial virus viability potentially due to the for-  
55 mation of a salt and carbon protective encasing; when associated with aerosol  
particles, the viruses remain capable of infection at low temperatures up to 6  
months. In addition to providing protection, a virus-PM interaction has the  
potential to modify virus infectivity characteristics. Due to PM black carbon  
fraction, virus-PM interactions have been shown to accelerate virus entry and  
60 bioavailability in the cell [9, 20, 6].

### *1.2. Sources and Long-term health impacts of air pollution*

The size and composition of PM is dependent on its source. Primary PM is  
ones produced directly in the source, whilst secondary PM is produced while in  
the atmosphere by gas-particle conversion processes. Vehicular (exhaust, tyre  
65 and break wear), soil dust resuspension, and industrial emissions are the main  
sources of PM with aerodynamic diameters between 2.5 and 10  $\mu\text{m}$  ( $\text{PM}_{10}$ ) in  
US urban centers [21, 22, 23, 24]. Secondary PM explains much of the mass  
of  $\text{PM}_{2.5}$ , followed by fuel combustion [25, 21]. The source apportionment of  
primary PM is more accurate as it retains the source composition at some level.  
70 Secondary PM is mostly produced by non-linear reactions, thus, information  
about source characteristics is lost [26, 27].

The effects of PM exposure in human health, especially in long-term, is well  
know and discussed [28, 29, 30, 31]. The penetrability of PM in the respiratory  
system depends on the particle size. Finer particles have a greater penetration  
75 potential [32].  $\text{PM}_{10}$  can penetrate the respiratory system mostly accumulating  
at the tracheobronchial tree.  $\text{PM}_{2.5}$  can reach the bronchioles and alveoli and  
penetrate the circulatory system [33]. PM concentration is also directly linked to  
viral infection [34]. Yao et al. suggest that long-term exposition to PM affects

COVID-19 prognosis [35]. Thus, its very likely the PM exposure is directly  
80 linked to the COVID-19 symptoms development and the daily cases report.

Fossil fuel usage is the main source of CO and NO<sub>2</sub> [36, 37, 38]. CO is relatively stable in the atmosphere with residence time of at least one month [39]. NO<sub>2</sub> is involved in many atmospheric reactions (e.g. ozone formation and secondary aerosol formation). Therefore, its concentration is not linearly  
85 proportional to fossil fuel usage [27].

The effects of long-term exposure to CO and NO<sub>2</sub> are matter of concern in many studies. The toxicity of CO is directly linked to cellular apoxia [40]. Short and long-term studies link chronicle exposure to CO with cardiovascular events and death [41]. There is no major link between ambient level CO and  
90 pulmonary complications [41]. NO<sub>2</sub> is a strong oxidant that affects mainly the lungs, causing diverse respiratory symptoms; it also increases the susceptibility to viral infection [42]. The effect of long-term exposition of NO<sub>2</sub> on mortality is comparable to PM<sub>2.5</sub> exposition [43].

### *1.3. Statistical modelling and time series analysis*

95 The incubation time of COVID-19 ranges from 4 to 15 days. Therefore, perturbations in the epidemic evolution caused by air pollution through airborne transmission would be observed in time lags within this same interval. It is simpler, however, to quantify the ability of air pollution to predict perturbations in the epidemic growth rather than asserting true causality. This can be done by  
100 computing linear correlations between the target variable (i.e., perturbations in cases) and the lagged explanatory variables (i.e., concentration of pollutants). In the econometric framework of Granger causality [44], it is possible to test if an explanatory variable, up to a number of lags in the past, contains useful information to forecast the target variable. If an explanatory variable pass this  
105 test above a significance threshold, it is said that it “Granger causes” the target variable.

Granger causality was employed in a number of studies related to air pollution. Jiang and Bai [45] investigated causal relationships between emissions

in Beijing and its neighboring cities. Zhu et al. [46] identified elements of the  
110 urban dynamics that Granger cause air pollution in China. Wang et al. [47] em-  
ployed Granger causality to relate mortality rates and air pollution. Mele and  
Magazzino [48] employed the same framework to investigate causal relationships  
between economic growth and air pollution in India.

More recently, studies investigating causes of new cases of COVID-19 and  
115 consequences of the global pandemic have employed the Granger framework.  
Bushman et al. [49] investigated the effect of social distancing on the number  
of deaths related to COVID-19. Awasthi et al. [50] inferred from causal models  
that temperature and humidity do not cause new cases of COVID-19.

The effect of air pollution on peaks of daily cases can be quantified by lagged  
120 correlations and Granger analysis. However, we also expect a relationship be-  
tween the shape of the accumulated cases curve and pollution. In other words,  
we expect that the SARS-CoV-2 spread is faster in more polluted cities. To  
this end, we employed a logistic regression to extract shape parameters of the  
accumulated cases curve. The logistic regression has been shown to fit well  
125 COVID-19 cases in Italy and China [51, 52]. The analysis of the impact of  
PM<sub>2.5</sub> as a carrier for the virus was performed to the EUA for two reasons,  
the high number of infected per day and the data accessibility to Pollutants  
concentrations and cases of COVID at many different cities and counties of the  
country.

## 130 **2. Methodology**

### *2.1. Data*

The following datasets were employed in this study:

- PM and pollutant gases data were retrieved from the World Air Quality In-  
dex (WAQI) project at <https://aqicn.org/data-platform/covid19> (Septem-  
135 ber 2020). The WAQI dataset is available at city level in the USA.

- 2019 Novel Coronavirus COVID-19 (2019-nCoV) Data Repository by Johns Hopkins University Center for Systems Science and Engineering for COVID-19 data, available at <https://github.com/CSSEGISandData/COVID-19> (September 2020). The data was retrieved at county level.

140 The period covered ranges from December 30, 2019 to July 31, 2020. Details in Table 1. WAQI aggregates data from local official monitoring datasets. City level pollution data were associated with the respective county level COVID-19 data by matching the metadata available in both datasets. Although ideally both datasets should be at the same administrative level, we expect this asso-  
145 ciation is appropriated for this study since the cities in the WAQI dataset are the most populous of their respective counties.

After matching COVID-19 and WAQI datasets we performed a quality check on the air pollution time series by selecting cities that: (1) Have at least 80% of data coverage after the first case was registered, (2) Have at least 70% of data  
150 coverage in the whole period and (3) The estimated precision of the pollution sensor is lesser than 1  $\mu\text{g}$  to PM and  $\text{NO}_2$  and 1 ppm to CO . Since the quality check was employed for each pollutant and location individually, the sets of cities available for each pollutant are not identical.

## 2.2. Granger causality

155 Granger causality tests were employed to investigate potential relationships between pollution levels (explanatory variables) and the rate of change of COVID-19 new cases (target variable). Granger causality is an econometric method that, when applied on two stationary time series, determines if one can be predicted by past values of the other. Since time series of COVID-19 daily new case are  
160 usually “bell” shaped they are highly non-stationary. Therefore, we considered the temporal differences (first derivatives) of the daily new cases time series; i.e., the rate of change of new cases. Then, an Augmented Dickey-Fuller (ADF) unit root test at a critical level of 5% was employed to assert the stationarity of all variables for each city before they were submitted to the Granger causality  
165 test.

| Variable | Stats / Values            | Freqs (% of Valid)  | Valid    | Missing |
|----------|---------------------------|---------------------|----------|---------|
| County   | 1. Albuquerque            | 198 ( 1.9%)         | 10296    | 0       |
|          | 2. Atlanta                | 198 ( 1.9%)         | (100.0%) | (0.0%)  |
|          | 3. Austin                 | 198 ( 1.9%)         |          |         |
|          | 4. Baltimore              | 198 ( 1.9%)         |          |         |
|          | 5. Boise                  | 198 ( 1.9%)         |          |         |
|          | [ 47 others ]             | 9306 (85.3%)        |          |         |
| State    | 1. Arizona                | 396 ( 3.8%)         | 10296    | 0       |
|          | 2. Arkansas               | 198 ( 1.9%)         | (100.0%) | (0.0%)  |
|          | 3. California             | 1188 (11.5%)        |          |         |
|          | 4. Colorado               | 198 ( 1.9%)         |          |         |
|          | 5. Connecticut            | 198 ( 1.9%)         |          |         |
|          | [ 26 others ]             | 8118 (78.8%)        |          |         |
| Day      | min : 2019-12-30          | 198 distinct values | 10296    | 0       |
|          | med : 2020-04-06 12:00:00 |                     | (100.0%) | (0.0%)  |
|          | max : 2020-07-14          |                     |          |         |
|          | range : 6m 14d            |                     |          |         |
| PM10     | Mean (sd) : 15.7 (7.9)    | 61 distinct values  | 4747     | 5549    |
|          | min <med <max:            |                     | (46.1%)  | (53.9%) |
|          | 1 <14 <100                |                     |          |         |
|          | IQR (CV) : 10 (0.5)       |                     |          |         |
| PM25     | Mean (sd) : 28.6 (13.7)   | 103 distinct values | 10152    | 144     |
|          | min <med <max:            |                     | (98.6%)  | (1.4%)  |
|          | 3 <25 <157                |                     |          |         |
|          | IQR (CV) : 18 (0.5)       |                     |          |         |
| NO2      | Mean (sd) : 7.3 (5.8)     | 248 distinct values | 6772     | 3524    |
|          | min <med <max:            |                     | (65.8%)  | (34.2%) |
|          | 0.3 <5.6 <48.2            |                     |          |         |
|          | IQR (CV) : 5.6 (0.8)      |                     |          |         |

Table 1: Dataset summary with descriptive statistics and missing data info. Note that this dataset is the one after the quality check described.



In the Granger causality test, the target variable was lagged in order to construct a linear autoregressive model. Then, the linear model was expanded to consider lags of the explanatory variable from zero to a maximum lag  $n$ . An F-test was employed to evaluate if the predictive power of the regression was enhanced by adding the lags of the explanatory variable from zero to  $n$ . The p-values of the F-test were computed iteratively for  $n$  ranging from 0 to 20 days. Then, the  $n$  associated with the most confident p-value was identified for each location. The ADF and Granger causality tests are described in [45]. We employed the implementation available in the Python library *statsmodels*.

### 2.3. Logistic curve fitting

The COVID-19 curve of accumulated cases approximates a logistic-like growth [51, 52]. In a logistic model (Eq. 1), the accumulated cases at a given time ( $N(t)$ ) is modeled as a function of the carrying capacity  $L$  (i.e., the susceptible population), the logistic growth rate  $r$  (i.e., the steepness of the curve) and the midpoint  $t_0$  which corresponds to the function's inflection point. The model was fitted for each city using a generalized linear model implementation in the R language *stats* library v3.6.2. Because of its sigmoidal shape, and the "bell" shape of its derivative, the logistic function cannot fit well a time series with more than one "wave" of new cases. To that end, we isolated the first wave of new cases by finding the inflection points (null second derivatives) of the accumulated cases time series; the first wave was defined as the time period before the second inflection point. The time series were smoothed by a 30-day running average before the derivatives were computed. The quality of fitting was quantified by the normalized root mean square error (NRMSE) and Shapiro-Wilk's test (SW).

$$N(t) = \frac{L}{1 + e^{r(t-t_0)}} \quad (1)$$

### 2.4. Lag Analysis

The lag analysis is the comparison between two datasets with one being displaced by  $-n$  samples, where  $n$  is a positive integer. In this study, we lagged the

pollutants concentrations in respect to the new cases time series with  $n$  ranging  
195 from 0 to 30 days. Then, we calculated the time averages of the pollutants  
concentrations within the first outbreak phase. These averages were linearly  
regressed against the logistic growth rate. By varying  $n$ , we explored the time  
window in which the mean pollution data is best correlated with the logistic  
model parameters in all cities.

### 200 **3. Results and discussion**

#### *3.1. Granger Causality*

Figure 1 shows the result of the Granger causality test in the counties con-  
sidered for each pollutant. Counties in green presented F-test p-values below  
0.05, while counties in pink are above this threshold. The counties displayed  
205 are not the same for all pollutants. This is because, in some locations, the time  
series either failed the ADF stationarity test or the pollution data failed the  
quality control.

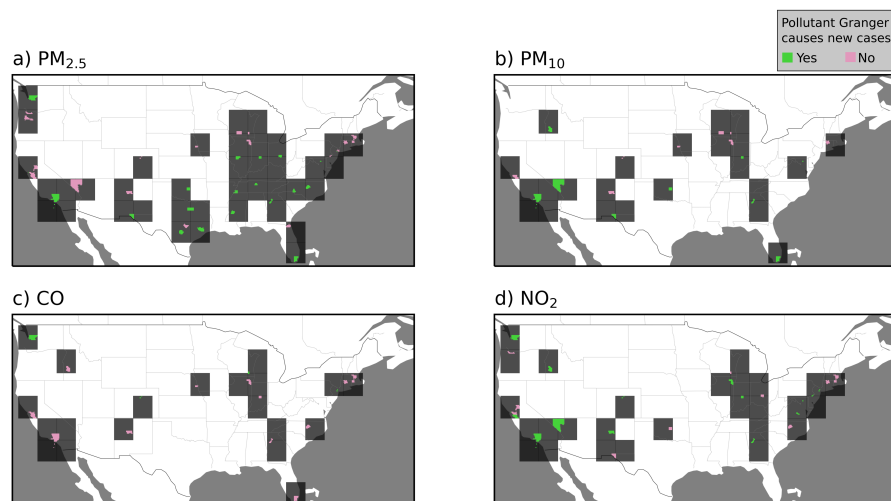

Figure 1: Spatial distribution of the Granger causality test between pollutants concentrations and COVID-19 new cases in USA counties. Counties where the p-values of the Granger F-test are green when below 0.05 and pink when above. Dark gray squares were plotted around colored counties to facilitate their visualization.

It is readily visible that PM<sub>2.5</sub> (Fig. 1a) Granger causes new COVID-19 cases in a substantial number of locations. This is also the case for PM<sub>10</sub> (Fig. 1b) and NO<sub>2</sub> (Fig. 1d); however, less locations are available for these pollutants. CO, on the other hand, visibly failed the F-test in most locations. The spatial distributions of locations where pollutants Granger cause new cases do not show any clear pattern, such as a preferential latitude. This is evidence against possible confounding effects, such as weather conditions or other regional particularities.

The boxplot in Figure 2a shows the distribution of p-values of the Granger F-test between the pollutants and COVID-19 new cases considering the locations shown in Figure 1. PM<sub>2.5</sub> shows a significant Granger causal link to the rate of change of COVID-19 new cases in 17 of 44 locations and presented the lowest p-value mean among the pollutants. NO<sub>2</sub> presented a lower median, however only 7 out of 28 locations presented p-value under the threshold of 0.05. PM<sub>10</sub>

mean and median p-value are higher than  $PM_{2.5}$  and  $PM_{10}$ ; in this case, 8 out of 20 locations passed the significance test. CO presented the highest p-value mean and median; only in 4 out of 21 locations a significant causality link was found. Figure 2b shows the distribution of lag windows for locations where there is a significant causal link between pollution and COVID-19 new cases. This allows us to verify that the SARS-CoV-2 incubation period is within the range of the lag windows encountered by the Granger analysis, sustaining the plausibility of the hypothesis.

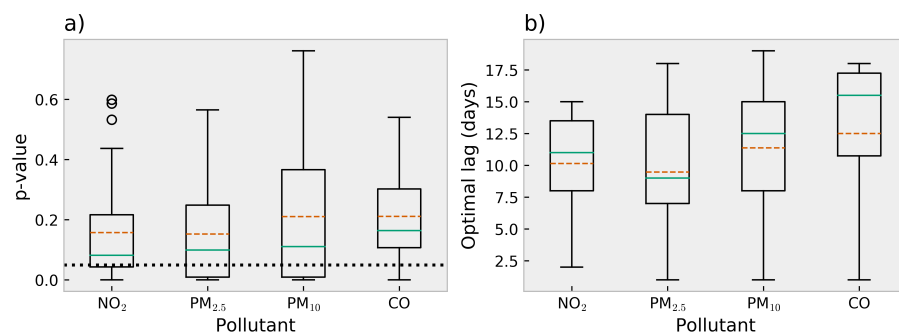

Figure 2: a) Boxplot of p-values of the Granger F-test between pollutants concentrations and COVID-19 new cases; b) boxplot of the optimal lag window size only considering locations where the p-values of the Granger F-test are below 0.05. Medians are teal solid lines and means are orange dashed lines. In a), the black dotted line identifies p-value = 0.05.

### 3.2. Logistic Model

For each city available for the pollutants we fitted a logistic curve to the accumulated cases data. The period selected in each city starts on the day where sixth case was recorded to the first minimum of the COVID-19 new cases (first phase of outbreak). The first minimum was obtained after smoothing the time series with 30-day moving averages. This was done in order to isolate the “first phase” or “first wave” of the epidemic because the logistic model supports a single sigmoid curve. The average NRMSE of the fits is  $0.0273 \pm 0.0096$  %. The average SW p-value for the fitted models is  $0.0141 \pm 0.0231$ . The NRMSE

lesser than 0.05 indicate a good overall fit. SW p-values lesser than 0.05 indicate  
240 normally distributed residuals without biases. Both indicates that the logistic  
model is well fitted to the curve of COVID-19 accumulated cases. Thus, the  
model parameters can be used to represent aspects of the observed data.

### *3.3. Lag Analysis*

Pearsons's correlation coefficient and their p-values (for the hypothesis of null  
245 correlation) were calculated between the average pollutant concentration and  
the logistic growth rate (Figure 3) in order to assert the relationship between the  
pollutants and the outbreaks growth rate. PM<sub>2.5</sub> presents higher and significant  
correlations from lags 0 to 18 days. CO presents significant correlations at all  
lags; its correlations are higher in later lags, in special after 26 days. Since CO  
250 is a good tracer to fossil fuel usage, large temporal shifts places the pollutant  
data outside the quarantine range. Thus, the rise of correlation at later lags is  
expected as it enhances the representation of the overall social mobility before  
the outbreak in the cities. This behaviour is also observed in PM<sub>10</sub> and NO<sub>2</sub>,  
although the latter do not present significant correlations.

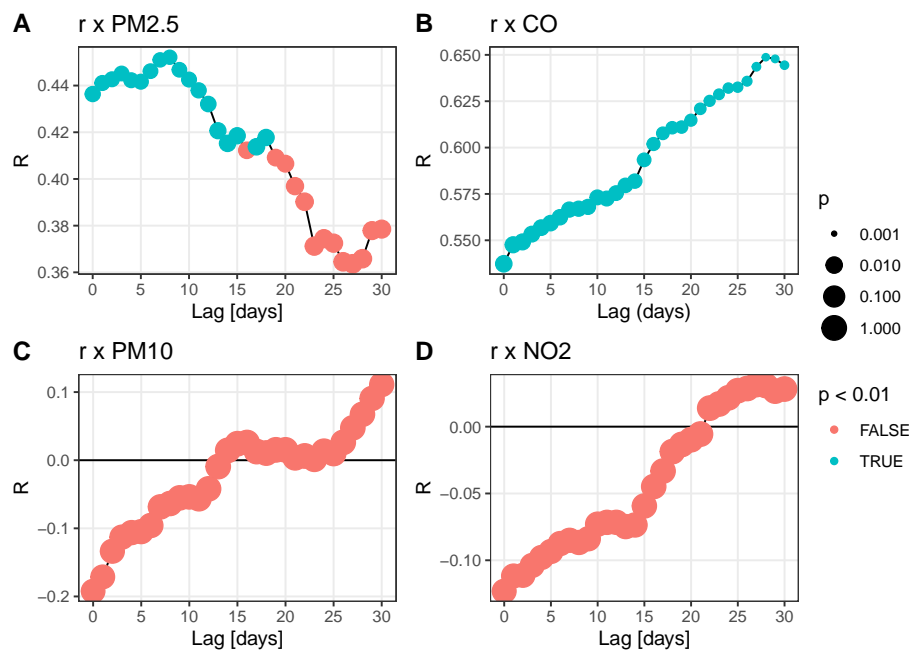

Figure 3: Pearson's correlation between the logistic growth rate and the pollutants for all cities for lags between 0 to 30 days. p-values for the zero zero correlation null-hypothesis are represented by the point size. p-values lesser than 0.01 are in red. The opposite is in blue.

255 PM<sub>2.5</sub> presents higher lags in a period that matches the SARS-CoV-2 incubation time. It support the Granger analysis about the short-term role of PM<sub>2.5</sub>. However the lag analysis points out a significant impact in the outbreak development, assigning a major role to PM<sub>2.5</sub>.

### 3.4. Quantifying the general impact of the pollutant sources

260 We used linear regressions to quantify the impact of PM on the spread of COVID-19 characterized by the logistic growth rate (Figure 4). Other regressions may be more appropriated, but they require justification based on previous knowledge of the mechanisms behind the PM/COVID-19 interaction. Therefore, the linear regression was employed as a naive method to determine the  
 265 general tendency of these relationships.

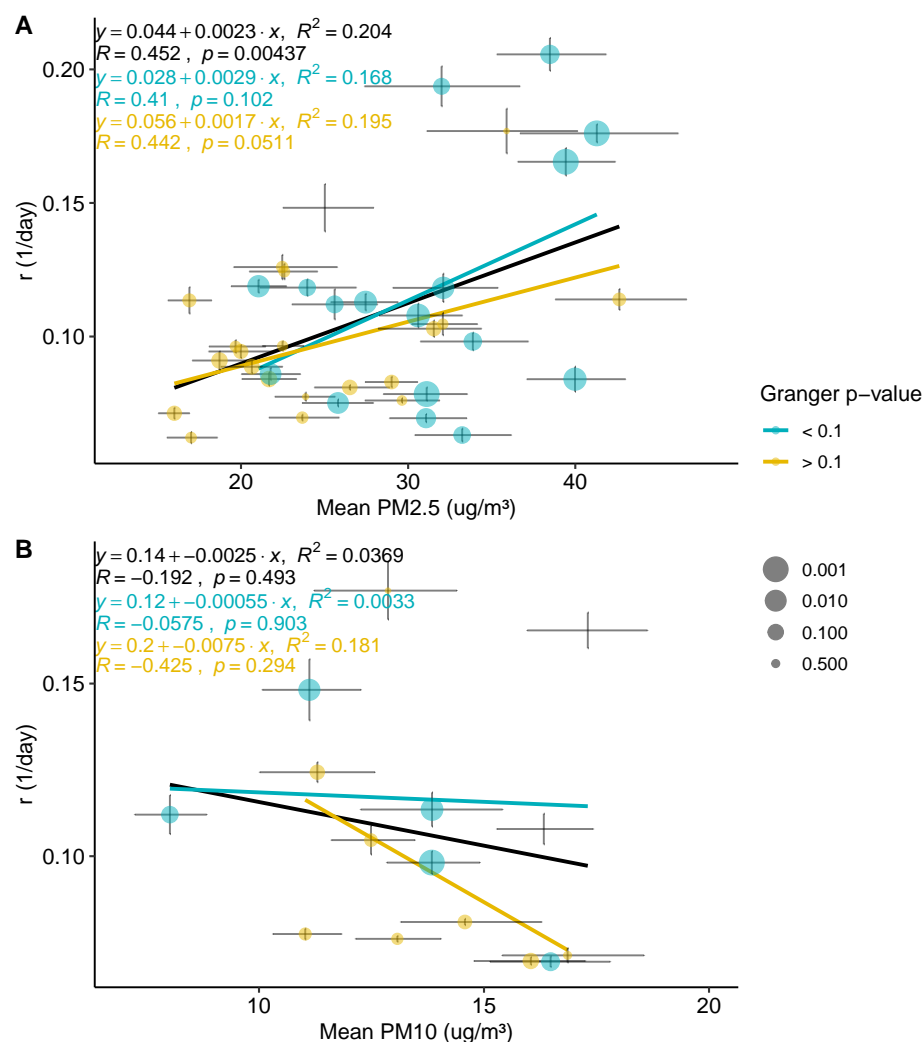

Figure 4: Logistic growth rate of COVID-19 accumulated cases ( $r$ ) as a function of mean pollutants concentrations. The average pollutants concentrations are in the best correlated lag calculated in the Lag Analysis section (8, and 0 days to  $PM_{2.5}$  and  $PM_{10}$  respectively). The linear regression with all cities is represented by the black line. Parameters of this linear regression are in each plot. Cities where the pollutant Granger causes new daily cases (described in Granger Causality section) are presented in blue, the rest in yellow. The size of points represents the p-value of the Granger test, greater sizes represent smaller p-values. Linear regression to the blue and yellow groups of points are presented by the blue and yellow lines. A version with the cities labeled in the plots is available in the Supplementary Material. The horizontal error bars were calculated using bootstrap with 1000 interactions. The vertical error bars were obtained from the logistic fit.<sup>15</sup>

In Figure 4A the general impact of  $PM_{2.5}$  in the outbreak is clear. We note, for example, that an increase in PM from 20 to  $40 \mu\text{g m}^{-3}$  rises the logistic growth rate from 0.09 to 0.136 1/day, corresponding to a 54% increase. If we only consider cities where the  $PM_{2.5}$  Granger causes the COVID-19 new cases, the same  $PM_{2.5}$  increase rises the logistic growth rate from 0.086 to 0.144 1/day, corresponding to a 67% increase. Considering cities where the Granger test fails, the same PM increase only rises the growth rate from 0.09 to 0.124 1/day (i.e., 38%). A similar behaviour occurs with the 0.1 and 0.9 quantiles of the  $PM_{2.5}$  (see supplementary material).  $PM_{10}$  (Figure 4B) shows no significant correlation with the logistic growth rate.

The interpretation of  $PM_{2.5}$ /COVID-19 statistical relationships is not straightforward. We can describe at least three potential mechanisms underpinning these relationships: (1) long-term  $PM_{2.5}$  exposure increases population susceptibility; (2)  $PM_{2.5}$  indicates social mobility and (3)  $PM_{2.5}$  is a viral airborne transport facilitator. Mechanisms 1 and 2 are confounding factors to Mechanism 3, so we will discuss them individually.

Mechanism 1 is expected to be present in all regressions in Figure 4A, as cities with higher mean  $PM_{2.5}$  in the studied period are likely to have an atmospheric polluted history. To separate the more instantaneous role of  $PM_{2.5}$  (Mechanism 3), we can consider the difference between the regression using cities where  $PM_{2.5}$  Granger causes new daily cases (blue line in Fig. 4A) and cities where the Granger test fails (yellow line). The higher slope of the blue regression indicates that Mechanism 3 is discernible from the confounding factor posed by Mechanism 1. Mechanism 2, however, does not seem to be an important confounding factor for Mechanism 3 as the lagged correlations between  $PM_{10}$  and  $NO_2$  are inconclusive and CO only passes the Granger test in four locations. Using the difference of the blue and yellow linear regressions in Fig. 4A, we calculate a rise of the logistic growth of 0.012 1/day based on an increase from 25 to  $35 \mu\text{g m}^{-3}$  of  $PM_{2.5}$ . For instance, the growth rate of accumulated cases in Boston of 0.096 1/day and  $PM_{2.5}$  averages at  $25 \mu\text{g m}^{-3}$ . An increase of  $10 \mu\text{g m}^{-3}$  of  $PM_{2.5}$  rises its growth rate by approximately 12.5%.



#### 4. Conclusion

In this study we explored the short-term role of the particulate matter in the COVID-19 outbreak in USA cities. We applied the Granger's causality tests, lag analysis and logistic modelling to investigate the statistical links between the spread of COVID-19 and pollution data. The comparison between PM and the other pollutants allowed us to isolate PM<sub>2.5</sub> from confounding factors and estimate its contribution to airborne viral transportation. The findings support the viral transport hypothesis, i.e., virus can associate with the pre-existent particulate matter in the air synergically. We conclude that PM<sub>2.5</sub> plays a small, yet discernible, role in the COVID-19 transmission.

The USA presents diverse geographic, climatic and political scenarios. This suggests that the conclusions presented here could be potentially be generalized to other countries. Increasingly abundant COVID-19 data worldwide will facilitate future studies to explore these interactions in a global scale. Broadly, we hope to rise the interest of the scientific community as well as the awareness of the general public and decision makers to the potential synergy between viral transmission and air pollution.

Considering that we are still with increasing mortality rate in most countries, any efforts to decrease the transmissibility of the COVID can be summed up with all the others to save some lives.

#### 5. Acknowledgements

We thank the Brazilian agencies CAPES, CNPq and FAPESP for funding this study. We also thank all the essential workers that are risking their lives in favor of society.

#### References

- [1] D. Lewis, Is the coronavirus airborne? experts can't agree, Nature 580 (7802) (2020) 175.

- [2] J. L. Santarpia, D. N. Rivera, V. Herrera, M. J. Morwitzer, H. Creager,  
325 G. W. Santarpia, K. K. Crown, D. Brett-Major, E. Schnaubelt, M. J.  
Broadhurst, et al., Transmission potential of sars-cov-2 in viral shedding  
observed at the university of nebraska medical center, *MedRxIV* (2020).
- [3] R. M. Anderson, H. Heesterbeek, D. Klinkenberg, T. D. Hollingsworth,  
330 How will country-based mitigation measures influence the course of the  
covid-19 epidemic?, *The Lancet* 395 (10228) (2020) 931–934.
- [4] W. C. Koh, L. Naing, L. Chaw, M. A. Rosledzana, M. F. Alikhan, S. A.  
Jamaludin, F. Amin, A. Omar, A. Shazli, M. Griffith, et al., What do  
we know about sars-cov-2 transmission? a systematic review and meta-  
analysis of the secondary attack rate and associated risk factors, *PloS one*  
335 15 (10) (2020) e0240205.
- [5] L. Setti, F. Passarini, G. De Gennaro, P. Barbieri, M. G. Perrone,  
M. Borelli, J. Palmisani, A. Di Gilio, V. Torboli, F. Fontana, et al., Sars-  
cov-2rna found on particulate matter of bergamo in northern italy: First  
evidence, *Environmental Research* (2020) 109754.
- [6] N. Groulx, B. Urch, C. Duchaine, S. Mubareka, J. A. Scott, The pollution  
340 particulate concentrator (popcon): A platform to investigate the effects of  
particulate air pollutants on viral infectivity, *Science of The Total Envi-  
ronment* 628 (2018) 1101–1107.
- [7] G. Chen, W. Zhang, S. Li, Y. Zhang, G. Williams, R. Huxley, H. Ren,  
345 W. Cao, Y. Guo, The impact of ambient fine particles on influenza trans-  
mission and the modification effects of temperature in china: A multi-city  
study, *Environment international* 98 (2017) 82–88.
- [8] C. Feng, J. Li, W. Sun, Y. Zhang, Q. Wang, Impact of ambient fine par-  
ticulate matter (pm 2.5) exposure on the risk of influenza-like-illness: a  
350 time-series analysis in beijing, china, *Environmental Health* 15 (1) (2016)  
17.

- [9] T. M. Cruz-Sanchez, A. E. Haddrell, T. L. Hackett, G. K. Singhera, D. Marchant, R. Lekivetz, A. Meredith, D. Horne, D. A. Knight, S. F. van Eeden, et al., Formation of a stable mimic of ambient particulate matter containing viable infectious respiratory syncytial virus and its dry-deposition directly onto cell cultures, *Analytical chemistry* 85 (2) (2013) 898–906.
- [10] R. Mishra, K. Pandikannan, S. Gangamma, A. A. Raut, H. Kumar, Imperative role of particulate matter in innate immunity during rna virus infection, *bioRxiv* (2020).
- [11] A. J. Cohen, M. Brauer, R. Burnett, H. R. Anderson, J. Frostad, K. Estep, K. Balakrishnan, B. Brunekreef, L. Dandona, R. Dandona, et al., Estimates and 25-year trends of the global burden of disease attributable to ambient air pollution: an analysis of data from the global burden of diseases study 2015, *The Lancet* 389 (10082) (2017) 1907–1918.
- [12] C. Maesano, G. Morel, A. Matynia, N. Ratsombath, J. Bonnetty, G. Legros, P. Da Costa, J. Prud’homme, I. Annesi-Maesano, Impacts on human mortality due to reductions in pm10 concentrations through different traffic scenarios in paris, france, *Science of The Total Environment* 698 (2020) 134257.
- [13] I. Reche, G. D’Orta, N. Mladenov, D. M. Winget, C. A. Suttle, Deposition rates of viruses and bacteria above the atmospheric boundary layer, *The ISME journal* 12 (4) (2018) 1154–1162.
- [14] Y. Liu, Z. Ning, Y. Chen, M. Guo, Y. Liu, N. K. Gali, L. Sun, Y. Duan, J. Cai, D. Westerdahl, et al., Aerodynamic characteristics and rna concentration of sars-cov-2 aerosol in wuhan hospitals during covid-19 outbreak, *BioRxiv* (2020).
- [15] N. Van Doremalen, T. Bushmaker, D. H. Morris, M. G. Holbrook, A. Gamble, B. N. Williamson, A. Tamin, J. L. Harcourt, N. J. Thornburg, S. I.

- 380 Gerber, et al., Aerosol and surface stability of sars-cov-2 as compared with  
sars-cov-1, *New England Journal of Medicine* 382 (16) (2020) 1564–1567.
- [16] N. T. Tung, P.-C. Cheng, K.-H. Chi, T.-C. Hsiao, T. Jones, K. Bérubé, K.-  
F. Ho, H.-C. Chuang, Particulate matter and sars-cov-2: a possible model  
of covid-19 transmission, *Science of The Total Environment* 750 (2020)  
385 141532.
- [17] J. Y. Aller, J. C. Radway, W. P. Kilthau, D. W. Bothe, T. W. Wilson, R. D.  
Vaillancourt, P. K. Quinn, D. J. Coffman, B. J. Murray, D. A. Knopf, Size-  
resolved characterization of the polysaccharidic and proteinaceous compo-  
nents of sea spray aerosol, *Atmospheric Environment* 154 (2017) 331–347.
- 390 [18] E. Ortega-Retuerta, U. Passow, C. M. Duarte, I. Reche, Effects of ultraviolet  
b radiation on (not so) transparent exopolymer particles, *Biogeosciences*  
6 (12) (2009) 3071–3080.
- [19] P. Vasickova, I. Pavlik, M. Verani, A. Carducci, Issues concerning survival  
of viruses on surfaces, *Food and Environmental Virology* 2 (1) (2010) 24–34.
- 395 [20] B. Michen, T. Graule, Isoelectric points of viruses, *Journal of applied mi-  
crobiology* 109 (2) (2010) 388–397.
- [21] G. D. Thurston, K. Ito, R. Lall, A source apportionment of us fine partic-  
ulate matter air pollution, *Atmospheric environment* 45 (24) (2011) 3924–  
3936.
- 400 [22] K. Cheung, M. M. Shafer, J. J. Schauer, C. Sioutas, Historical trends in  
the mass and chemical species concentrations of coarse particulate matter  
in the los angeles basin and relation to sources and air quality regulations,  
*Journal of the Air & Waste Management Association* 62 (5) (2012) 541–556.
- 405 [23] F. Shirmohammadi, S. Hasheminassab, D. Wang, A. Saffari, J. J. Schauer,  
M. M. Shafer, R. J. Delfino, C. Sioutas, Oxidative potential of coarse partic-  
ulate matter (pm 10–2.5) and its relation to water solubility and sources of

trace elements and metals in the los angeles basin, *Environmental Science: Processes & Impacts* 17 (12) (2015) 2110–2121.

- [24] Y. H. Kim, Q. T. Krantz, J. McGee, K. D. Kovalcik, R. M. Duvall, R. D. Willis, A. S. Kamal, M. S. Landis, G. A. Norris, M. I. Gilmour, Chemical composition and source apportionment of size fractionated particulate matter in cleveland, ohio, usa, *Environmental Pollution* 218 (2016) 1180–1190.
- [25] J. A. Sarnat, A. Marmur, M. Klein, E. Kim, A. G. Russell, S. E. Sarnat, J. A. Mulholland, P. K. Hopke, P. E. Tolbert, Fine particle sources and cardiorespiratory morbidity: an application of chemical mass balance and factor analytical source-apportionment methods, *Environmental health perspectives* 116 (4) (2008) 459–466.
- [26] A. S. Ansari, S. N. Pandis, Response of inorganic pm to precursor concentrations, *Environmental Science & Technology* 32 (18) (1998) 2706–2714.
- [27] M. J. Mysliwiec, M. J. Kleeman, Source apportionment of secondary airborne particulate matter in a polluted atmosphere, *Environmental science & technology* 36 (24) (2002) 5376–5384.
- [28] R. C. Puett, J. E. Hart, J. D. Yanosky, C. Paciorek, J. Schwartz, H. Suh, F. E. Speizer, F. Laden, Chronic fine and coarse particulate exposure, mortality, and coronary heart disease in the nurses’ health study, *Environmental health perspectives* 117 (11) (2009) 1697–1701.
- [29] Z. Cheng, J. Jiang, O. Fajardo, S. Wang, J. Hao, Characteristics and health impacts of particulate matter pollution in china (2001–2011), *Atmospheric Environment* 65 (2013) 186–194.
- [30] K.-H. Kim, E. Kabir, S. Kabir, A review on the human health impact of airborne particulate matter, *Environment international* 74 (2015) 136–143.
- [31] J. Lepeule, F. Laden, D. Dockery, J. Schwartz, Chronic exposure to fine particles and mortality: an extended follow-up of the harvard six cities

- study from 1974 to 2009, *Environmental health perspectives* 120 (7) (2012)  
435 965–970.
- [32] J. S. Brown, T. Gordon, O. Price, B. Asgharian, Thoracic and respirable particle definitions for human health risk assessment, *Particle and fibre toxicology* 10 (1) (2013) 12.
- [33] J. Löndahl, J. Pagels, E. Swietlicki, J. Zhou, M. Ketzler, A. Massling, M. Bohgard, A set-up for field studies of respiratory tract deposition of fine and  
440 ultrafine particles in humans, *Journal of Aerosol Science* 37 (9) (2006) 1152–1163.
- [34] J. Ciencewicky, I. Jaspers, Air pollution and respiratory viral infection, *Inhalation toxicology* 19 (14) (2007) 1135–1146.
- 445 [35] Y. Yao, J. Pan, W. Wang, Z. Liu, H. Kan, Y. Qiu, X. Meng, W. Wang, Association of particulate matter pollution and case fatality rate of covid-19 in 49 chinese cities, *Science of the Total Environment* 741 (2020) 140396.
- [36] D. Parrish, M. Trainer, D. Hereid, E. Williams, K. Olszyna, R. Harley, J. Meagher, F. Fehsenfeld, Decadal change in carbon monoxide to nitrogen  
450 oxide ratio in us vehicular emissions, *Journal of Geophysical Research: Atmospheres* 107 (D12) (2002) ACH-5.
- [37] S. M. Miller, D. M. Matross, A. E. Andrews, D. B. Millet, M. Longo, E. W. Gottlieb, A. I. Hirsch, C. Gerbig, J. C. Lin, B. C. Daube, et al., Sources of carbon monoxide and formaldehyde in north america determined from  
455 high-resolution atmospheric data (2008).
- [38] S. Mukerjee, L. A. Smith, M. M. Johnson, L. M. Neas, C. A. Stallings, Spatial analysis and land use regression of vocs and no2 from school-based urban air monitoring in detroit/dearborn, usa, *Science of the Total Environment* 407 (16) (2009) 4642–4651.
- 460 [39] B. Weinstock, Carbon monoxide: Residence time in the atmosphere, *Science* 166 (3902) (1969) 224–225.

- [40] C. A. Piantadosi, Toxicity of carbon monoxide: hemoglobin vs. histotoxic mechanisms, *Carbon monoxide* (1996) 163–186.
- [41] T.-M. Chen, W. G. Kuschner, J. Gokhale, S. Shofer, Outdoor air pollution: nitrogen dioxide, sulfur dioxide, and carbon monoxide health effects, *The American journal of the medical sciences* 333 (4) (2007) 249–256.
- [42] A. H. Wolfe, J. A. Patz, Reactive nitrogen and human health: acute and long-term implications, *Ambio: A journal of the human environment* 31 (2) (2002) 120–125.
- [43] A. Faustini, R. Rapp, F. Forastiere, Nitrogen dioxide and mortality: review and meta-analysis of long-term studies, *European Respiratory Journal* 44 (3) (2014) 744–753.
- [44] C. W. Granger, Investigating causal relations by econometric models and cross-spectral methods, *Econometrica: journal of the Econometric Society* (1969) 424–438.
- [45] L. Jiang, L. Bai, Spatio-temporal characteristics of urban air pollutions and their causal relationships: Evidence from beijing and its neighboring cities, *Scientific reports* 8 (1) (2018) 1–12.
- [46] J. Y. Zhu, C. Sun, V. O. K. Li, Granger-causality-based air quality estimation with spatio-temporal (s-t) heterogeneous big data, in: *2015 IEEE Conference on Computer Communications Workshops (INFOCOM WKSHPS)*, 2015, pp. 612–617.
- [47] Q. Wang, Y. Liu, X. Pan, Atmosphere pollutants and mortality rate of respiratory diseases in beijing, *Science of the Total Environment* 391 (1) (2008) 143–148.
- [48] M. Mele, C. Magazzino, Pollution, economic growth, and covid-19 deaths in india: a machine learning evidence, *Environmental Science and Pollution Research* (2020) 1–9.

- 490 [49] K. Bushman, K. Pelechrinis, A. Labrinidis, Effectiveness and compliance to social distancing during covid-19, arXiv preprint arXiv:2006.12720 (2020).
- [50] R. Awasthi, A. Nagori, P. Singh, R. Pal, V. Joshi, T. Sethi, Temperature and humidity do not influence global covid-19 incidence as inferred from causal models, medRxiv (2020).
- 495 [51] A. Remuzzi, G. Remuzzi, Covid-19 and italy: what next?, The Lancet (2020).
- [52] K. Wu, D. Darcet, Q. Wang, D. Sornette, Generalized logistic growth modeling of the covid-19 outbreak in 29 provinces in china and in the rest of the world, arXiv preprint arXiv:2003.05681 (2020).
