# Supplementary material for: Exploring the short-term role of particulate matter in the COVID-19 outbreak in USA cities
Source: bioRxiv or medRxiv preprint supplement (doi:10.1101/2021.03.09.21253212), 2021-03-11
Supplement: Supplementary file [file media-1.pdf]

Exploring the short-term role of particulate  
matter in the COVID-19 outbreak in USA cities -  
Supporting Information

Leonardo Yoshiaki Kamigauti<sup>1</sup>, Gabriel Martins Palma Perez<sup>2</sup>,  
Carlos Eduardo Souto-Oliveira<sup>1</sup>, Elizabeth Cowdery<sup>3</sup>, Paulo  
Hilário Nascimento Saldiva<sup>4</sup>, and Maria de Fatima Andrade<sup>1</sup>

<sup>1</sup>Department of Atmospheric Sciences, University of São Paulo,  
São Paulo, Brazil

<sup>2</sup>Department of Meteorology, University of Reading, Earley Gate,  
United Kingdom

<sup>3</sup>Department of Earth and Environment, University of Boston,  
Boston, United States of America

<sup>4</sup>Department of Pathology, University of São Paulo, São Paulo,  
Brazil

February 2021

This supporting information has 5 pages including Tables S1-S4.

|    | County        | State          | p-value |
|----|---------------|----------------|---------|
| 1  | Fort Worth    | Texas          | 0.00    |
| 2  | Jacksonville  | Florida        | 0.00    |
| 3  | Nashville     | Tennessee      | 0.00    |
| 4  | San Antonio   | Texas          | 0.00    |
| 5  | Oklahoma City | Oklahoma       | 0.00    |
| 6  | Raleigh       | North Carolina | 0.00    |
| 7  | Miami         | Florida        | 0.00    |
| 8  | Jackson       | Mississippi    | 0.00    |
| 9  | Springfield   | Illinois       | 0.01    |
| 10 | Memphis       | Tennessee      | 0.01    |
| 11 | Staten Island | New York       | 0.01    |
| 12 | Los Angeles   | California     | 0.01    |
| 13 | Seattle       | Washington     | 0.01    |
| 14 | Columbus      | Ohio           | 0.01    |
| 15 | Indianapolis  | Indiana        | 0.02    |
| 16 | Houston       | Texas          | 0.04    |
| 17 | Atlanta       | Georgia        | 0.05    |
| 18 | Baltimore     | Maryland       | 0.06    |
| 19 | Dallas        | Texas          | 0.07    |
| 20 | San Francisco | California     | 0.07    |
| 21 | Charlotte     | North Carolina | 0.09    |
| 22 | El Paso       | Texas          | 0.10    |
| 23 | Providence    | Rhode Island   | 0.10    |
| 24 | Portland      | Oregon         | 0.10    |
| 25 | Brooklyn      | New York       | 0.13    |
| 26 | Omaha         | Nebraska       | 0.14    |
| 27 | Little Rock   | Arkansas       | 0.15    |
| 28 | Albuquerque   | New Mexico     | 0.15    |
| 29 | Manhattan     | New York       | 0.15    |
| 30 | Philadelphia  | Pennsylvania   | 0.18    |
| 31 | Sacramento    | California     | 0.18    |
| 32 | Las Vegas     | Nevada         | 0.22    |
| 33 | Austin        | Texas          | 0.23    |
| 34 | Oakland       | California     | 0.31    |
| 35 | Denver        | Colorado       | 0.31    |
| 36 | San Jose      | California     | 0.34    |
| 37 | Salem         | Oregon         | 0.36    |
| 38 | Queens        | New York       | 0.36    |
| 39 | Detroit       | Michigan       | 0.38    |
| 40 | Boston        | Massachusetts  | 0.39    |
| 41 | Milwaukee     | Wisconsin      | 0.40    |
| 42 | Chicago       | Illinois       | 0.42    |
| 43 | Hartford      | Connecticut    | 0.56    |
| 44 | Madison       | Wisconsin      | 0.56    |

Table 1: Results of Granger Analysis for PM25.

|    | County        | State       | p-value |
|----|---------------|-------------|---------|
| 1  | Miami         | Florida     | 0.00    |
| 2  | Jacksonville  | Florida     | 0.00    |
| 3  | Oklahoma City | Oklahoma    | 0.00    |
| 4  | Atlanta       | Georgia     | 0.00    |
| 5  | Las Vegas     | Nevada      | 0.01    |
| 6  | Boise         | Idaho       | 0.01    |
| 7  | El Paso       | Texas       | 0.02    |
| 8  | Indianapolis  | Indiana     | 0.05    |
| 9  | Los Angeles   | California  | 0.08    |
| 10 | Baltimore     | Maryland    | 0.09    |
| 11 | Denver        | Colorado    | 0.13    |
| 12 | San Jose      | California  | 0.19    |
| 13 | Omaha         | Nebraska    | 0.23    |
| 14 | Detroit       | Michigan    | 0.30    |
| 15 | Hartford      | Connecticut | 0.35    |
| 16 | Chicago       | Illinois    | 0.42    |
| 17 | Honolulu      | Hawaii      | 0.43    |
| 18 | Milwaukee     | Wisconsin   | 0.46    |
| 19 | Albuquerque   | New Mexico  | 0.68    |
| 20 | Madison       | Wisconsin   | 0.76    |

Table 2: Results of Granger Analysis for PM10.

|    | County        | State          | p-value |
|----|---------------|----------------|---------|
| 1  | Denver        | Colorado       | 0.00    |
| 2  | Staten Island | New York       | 0.00    |
| 3  | Seattle       | Washington     | 0.01    |
| 4  | Milwaukee     | Wisconsin      | 0.02    |
| 5  | Manhattan     | New York       | 0.07    |
| 6  | San Jose      | California     | 0.11    |
| 7  | Raleigh       | North Carolina | 0.11    |
| 8  | Albuquerque   | New Mexico     | 0.13    |
| 9  | Boise         | Idaho          | 0.15    |
| 10 | Oakland       | California     | 0.15    |
| 11 | Indianapolis  | Indiana        | 0.16    |
| 12 | Atlanta       | Georgia        | 0.21    |
| 13 | Chicago       | Illinois       | 0.22    |
| 14 | Providence    | Rhode Island   | 0.22    |
| 15 | Los Angeles   | California     | 0.26    |
| 16 | Omaha         | Nebraska       | 0.30    |
| 17 | Hartford      | Connecticut    | 0.35    |
| 18 | San Francisco | California     | 0.42    |
| 19 | Jacksonville  | Florida        | 0.49    |
| 20 | Miami         | Florida        | 0.50    |
| 21 | Boston        | Massachusetts  | 0.54    |

Table 3: Results of Granger Analysis for CO.

|    | County        | State          | p-value |
|----|---------------|----------------|---------|
| 1  | Denver        | Colorado       | 0.00    |
| 2  | Seattle       | Washington     | 0.00    |
| 3  | Boise         | Idaho          | 0.00    |
| 4  | Manhattan     | New York       | 0.01    |
| 5  | Baltimore     | Maryland       | 0.02    |
| 6  | Indianapolis  | Indiana        | 0.02    |
| 7  | San Francisco | California     | 0.02    |
| 8  | Staten Island | New York       | 0.05    |
| 9  | Philadelphia  | Pennsylvania   | 0.05    |
| 10 | Chicago       | Illinois       | 0.06    |
| 11 | Albuquerque   | New Mexico     | 0.07    |
| 12 | San Jose      | California     | 0.07    |
| 13 | Atlanta       | Georgia        | 0.08    |
| 14 | Los Angeles   | California     | 0.08    |
| 15 | Las Vegas     | Nevada         | 0.08    |
| 16 | Richmond      | Virginia       | 0.09    |
| 17 | Hartford      | Connecticut    | 0.11    |
| 18 | El Paso       | Texas          | 0.12    |
| 19 | Providence    | Rhode Island   | 0.12    |
| 20 | Boston        | Massachusetts  | 0.14    |
| 21 | Sacramento    | California     | 0.20    |
| 22 | Milwaukee     | Wisconsin      | 0.27    |
| 23 | Portland      | Oregon         | 0.27    |
| 24 | Columbus      | Ohio           | 0.30    |
| 25 | Jacksonville  | Florida        | 0.44    |
| 26 | Raleigh       | North Carolina | 0.53    |
| 27 | Oakland       | California     | 0.59    |
| 28 | Oklahoma City | Oklahoma       | 0.60    |

Table 4: Results of Granger Analysis for NO<sub>2</sub>.
